# Supplementary material for: Integrated β-catenin, BMP, PTEN, and Notch signalling patterns the nephron
Source: PubMed Central journal article supplement (PMC4337611; doi:10.7554/elife.04000), 2015-02-03
Supplement: elife04000s001.pdf [file elife04000s001.pdf]

## Supplementary Table1

Primers and UPL probes used in qRT-PCR analysis

| <b>Genes</b>              | <b>Primer (left)</b>       | <b>Primer (right)</b>   | <b>UPL Probe</b> |
|---------------------------|----------------------------|-------------------------|------------------|
| <i>Tcf1</i>               | ggagctgcagccatgatag        | tagcctccttctctgccttg    | 96               |
| <i>Axin2</i>              | gagagtgagcggcagagc         | cggctgactcgttctcct      | 96               |
| <i>Ccnd1</i>              | gagatttgccatccatgc         | ctcctcttcgcacttctgct    | 67               |
| <i>c-Myc</i>              | cctagtgtgcatgaggaga        | tccacagacaccacatcaattt  | 77               |
| <i>Nphs2</i>              | ccatctggttctgcataaagg      | ccaggaccttggctcttc      | 38               |
| <i>Synpo</i>              | gtagccaggtgagccaagg        | tttcggtgaagcttgctgc     | 67               |
| <i>Nphs1</i>              | aacatccagctcgtcagcat       | agggctcacgctcacaac      | 45               |
| <i>Podxl</i>              | cctgcactcactccataat        | tctgtgatgttggtgactt     | 21               |
| <i>Fat1</i>               | caaccacgtcaggaagc          | caccgttctctgcacagtaactt | 18               |
| <i>Fyn</i>                | gccaagcagtggttgaagg        | cagcggcggactgactt       | 89               |
| <i>Wnt4</i>               | ctggactccctccctgtctt       | atgcccttgcactgcaaa      | 62               |
| <i>Pax8</i>               | gcagctatgcctcttctgcta      | gctgtaggcattgccagaat    | 4                |
| <i>Pax2</i>               | cactgatcctgccacatta        | cattagggacagagccctca    | 10               |
| <i>Fgf8</i>               | tctgcctaaagtacacagc        | tgagctgatccgtcacca      | 32               |
| <i>Jag1</i>               | gaggcgtcctctgaaaaaca       | acccaagccactgtaagaca    | 6                |
| <i>Lhx1</i>               | aatgcaacctgaccgagaag       | cgcatttggtagcgaacat     | 7                |
| <i>Dll1</i>               | gggcttctctggcttcaac        | taagagttgccgaggtccac    | 103              |
| <i>HeyL</i>               | ctgaattgcgacgattggt        | gcaagacctcagctttctcc    | 25               |
| <i>Hey1</i>               | accatcgaggtggaaaagg        | cttctcgatgatgcctctcc    | 72               |
| <i>Lgr5 probe/primer1</i> | cttcaactcgggtgcagtgtct     | gatcagccagctaccaatagg   | 60               |
| <i>Lgr5 probe/primer2</i> | ttcaactcgggtgcagtgtct      | ggatcagccagctaccaata    | 100              |
| <i>Lgr5 probe/primer3</i> | tgcagaacaaccagctgaga       | gatgtggttggcatctagcc    | 69               |
| <i>Lgr4 probe/primer1</i> | cagttaccagaagatgcatttaagaa | caaggcttttgggtggataa    | 20               |
| <i>Lgr4 probe/primer1</i> | tcaggctattaaagcccttcc      | tccatccgggataacagaaa    | 33               |
